# Supplementary material for: “Wonderful! We’ve just missed the bus.” – Parental use of irony and children’s irony comprehension
Source: PLoS One. 2020 Feb 21;15(2):e0228538. doi: 10.1371/journal.pone.0228538 (PMC7034895; doi:10.1371/journal.pone.0228538)
Supplement: S1 Data — (XLSX) [file pone.0228538.s001.xlsx]

## Sheet: ATI mom
Lp.	KOD DZIECKA	IRO1 1	IRO1 2	IRO1 3	IRO1 4	sum
1	PL-OZ-003mat	1	5	1	1	8
2	PL-MST-002mat	2	2	2	2	8
3	PL-MST-003mat	1	1	2	1	5
4	PL-MST-004mat	1	0	2	5	8
5	PL-MST-005mat	1	2	2	0	5
6	PL-OZ-004mat	5	5	2	1	13
7	PL-AK-001mat	1	0	1	1	3
8	PL-AK-002mat	1	1	2	1	5
9	PL-AK-003mat	1	1	5	5	12
10	PL-AK-004mat	2	2	2	0	6
11	PL-AK-005mat	1	1	1	1	4
12	PL-AK-006mat	1	0	2	0	3
13	PL-AK-007mat	0	0	1	0	1
14	PL-AK-008mat	2	2	1	1	6
15	PL-ZP-001mat	5	1	2	2	10
16	PL-ZP-002mat	1	0	1	0	2
17	PL-ZP-003mat	1	2	2	1	6
18	PL-ZP-004mat	5	2	1	5	13
19	PL-ZP-005mat	1	0	1	0	2
20	PL-ZP-007mat	1	1	2	0	4
21	PL-ZP-008mat	1	1	2	0	4
22	PL-ZP-009mat	5	1	2	0	8
23	PL-ZP-010mat	N/A	0	2	N/A
24	PL-ZP-014mat	0	5	1	1	7
25	PL-ZP-011mat	1	1	2	0	4
26	PL-ZP-012mat	0	2	2	0	4
27	PL-ZL-001mat	1	1	1	0	3
28	PL-NBJ-003	1	1	5	1	8
29	PL-OZ-005	1	2	1	1	5
30	PL-MST-002mat	2	2	2	2	8
31	PL-MST-003mat	1	1	2	1	5
32	PL-MST-004mat	1	0	2	5	8
33	PL-MST-005mat	1	2	2	0	5
34	PL-ZL-001mat	1	1	1	0	3
35	PL-ZL-002mat	2	1	0	0	3
36	PL-KW-001mam	NA	NA	NA	NA
37	Pl-NBJ-002	NA	NA	NA	NA
38	PL-NBJ-003	1	1	5	1	8
39	PL-ZS-001	0	1	2	0	3
40	PL-KKK-001	2	5	2	0	9
41	PL-KKK-002	1	1	5	0	7
42	PL-KKK-003	1	2	2	0	5
43	PL-ZL-003mat	1	1	2	0	4
44	PL-ZL-003mat	0	1	0	1	2
45	PL-OZ-006	1	1	2	0	4
46	PL-OZ-007	1	2	2	0	5
47	PL-OZ-008	2	0	2	1	5
48	PL-ZS-002	1	1	2	0	4

## Sheet: ATI dad
Lp.	KOD DZIECKA	IRO1 1	IRO1 2	IRO1 3	IRO1 4	sum
0	PL-NBJ-001
1	PL-ZS-001ojc
2	PL-OZ-003ojc	2	2	1	1	4
3	PL-MST-002ojc	5	0	2	1	3
4	PL-MST-003ojc	5	1	5	0	6
5	PL-OZ-004 ojc	1	2	2	0	4
6	PL-AK-001ojc	1	1	1	0	2
7	PL-AK-002ojc	1	2	2	1	5
8	PL-AK-003ojc	5	0	1	0	1
9	PL-AK-004ojc	5	0	0	2	2
10	PL-AK-005ojc	5	5	0	0	5
11	PL-AK-006ojc	2	5	0	0	5
12	PL-AK-007ojc	0	0	0	0	0
13	PL-AK-008ojc	5	2	2	0	4
14	PL-MST-005ojc	2	1	1	0	2
15	PL-ZP-001tat	0	1	2	0	3
16	PL-ZP-003tat	2	2	1	1	4
17	PL-ZP-005tat	1	2	0	0	2
18	PL-ZP-007tat	1	0	2	1	3
19	PL-ZP-008tat	1	0	2	1	3
20	PL-ZP-009tat	2	2	1	2	5
21	PL-ZP-010tat	brak				0
22	PL-ZP-011tat	1	0	0	1	1
23	PL-ZP-012tat	1	0	0	0	0
24	PL-ZL-001tat	1	1	2	1	4
25	PL-MST-004ojc	0	0	0	0	0
26	PL-ZP-006tat	1	0	1		1
	PL-MST-002ojc	5	0	2	1	3
	PL-MST-003ojc	5	1	5	0	6
	PL-MST-004ojc	0	0	0	0	0
	PL-MST-005ojc	2	1	1	0	2
	PL-ZL-001ojc	1	1	2	1	4
	PL-ZL-002ojc	2	2	2	1	5
	PL-KW-001tat	NA	NA	NA	NA
	PL-NBJ-002	NA	NA	NA	NA
	PL-NBJ-003	NA	NA	NA	NA
	PL-ZS-001ojc	1	1	5	0	6
	PL-KKK-001	1	1	0	0	1
	PL-KKK-002	0	0	2	0	2
	PL-KKK-003	NA	NA	NA	NA
	PL-ZL-003ojc	1	1	2	1	4
	PL-ZL-004ojc	1	2	5	1	8
	PL-OZ-006	NA	NA	NA	NA
	PL-OZ-007	0	2	2	0	4
	PL-OZ-008	NA	NA	NA	NA
	PL-ZS-002	1	0	1	0	1

## Sheet: Irony Comprehension Task_short
PL-	KOD DZIECKA	ZRI1 1	ZRI1 2	ZRI1 3	ZRI1 4	ZRI2 1	ZRI2 2	ZRI2 3	ZRI2 4	ZRI3 1	ZRI3 2	ZRI3 3	ZRI3 4	suma_rozumienie	IRO_binary	iro_verbal_1	iro_verbal_2	iro_verbal_3	iro_verbal_sum	iro_sum_verbalnonverbal
26	PL-AK-001	Dlatego że czasem niektórzy starsi tak mówią z żalem, ale tak żeby było śmiesznie, (żeby się nie czuł niezbyt dobrze(?))	1	2	2	Tak z żalem, że świetny dzień, ale jednak nie świetny, czasem się tak mówi jak coś się źle robi, ale mówi się, że to dobra opinia, a to zła opinia	1	1	1	(...)Tak powiedziała tak niezbyt fajnie "to moje przepyszne jedzenie", tak z żalem to powiedziała; że nie lubi tego, ale mówi że lubi, tak z żalem	1	0	1	3	1	2	1	1	4	7
27	PL-AK-002	Bo np jak mama wyprała ten obrus to on chciał żeby mama ciągle pracowała i sie cieszył że brat wylał na stół ten sok	0	0	0	No bo im się nie udało dojść do autobusu no i dlatego tak powiedziała; oni naprawdę nie mieli szczęścia	1	1	1	No bo nie lubiła tego i tak żeby sie ta druga koleżanka śmiała	1	0	0	2	0	0	1	2	3	5
28	PL-AK-003	Dlatego że np ten młodszy brat mu dokuczał i chciał żeby miał karę i może ten chłopczyk się poczuł trochę nieswój (?) bo wiedział co go czeka	1	0	0	Dlatego że np mogli więcej spalić kalorii albo czegoś i mogli się bardziej poruszać	1	0	1	Bo np ona lubi, a ta jej koleżanka nie lubi [i co chciała przez to powiedzieć?] bo np jej rdzice albo babcia bardzo dobre robi i się przyzwyczaiła do szpinaku albo po prostu lubi jeść szpinak	1	0	1	3	1	0	0	0	0	3
29	PL-AK-004	Bo był zły na brata, że wylał sok	1	0	1	Bo była zła, że autobus odjechał	1	0	1	Bo nie lubi szpinaku	1	0	1	3	1	2	2	1	5	8
30	PL-AK-005	No bo rozlał, a obrus był czysty, dopiero wymyty [dlaczego te słowa "świetnie sie spisałeś", jakby zrobił coś dobrego] -> bo był zdenerwowany, powiedział na żarty	1	0	0	Bo była zdenerwowana że autobus odjechał, nie poczekał, powiedziała na żarty, jak w tamtej historyjce	1	0	0	Bo mówili, że w przedszkolu nie chciała jeść, bo nie lubi tego i w domu to samo [tylko dlaczego powiedziała, że to jej ulubione jedzenie?] ->myślę, że na żarty	1	0	0	3	1	2	2	1	5	8
31	PL-AK-006	Dlatego, że był zły, że brat ubrudził czysty obrus [ale dlaczego powiedział "świetnie", jakby chciał go pochwalić, czy Krzyś zrobił dobrze, czy źle, masz jakiś pomysł?]->... nie wiem	1	0	1	Dlatego, że autobus odjechał bez nich [dlaczego akurat takie słowa?]->Dlatego, że była zła, że autobus odjechał bez nich i muszą moknąć	1	0	1	Dlatego, że nie lubiła jeść szpinaku [a dlaczego powiedziała, że to jej ulubione jedzenie, skoro nie lubi?]-> ... nie wiem	1	1	1	3	1	2	2	1	5	8
32	PL-AK-007	Tak się czasem mówi jak ktoś coś zrobi złego, może niedokładnie złego, ale ktoś coś zrobi	1	0	0	Mama tak powiedziała, bo tak się też mówi, jak np odjedzie autobus albo jak ktoś coś zrobi np. mama komuś mówiła, żeby coś zrobił, a on zrobił coś innego	1	0	1	Też tak się mówi, kiedy ktoś czegoś nie lubi jeść	1	0	0	3	1	1	1	1	3	6
33	PL-AK-008	Że on tak to źle zrobił, że to wylał, tak mi czasami mówią	1	0	0	Mama tak mogła powiedzieć na wielkie nieszczęście, że im autobus odjechał i muszą moknąć w deszczu i iść do domu	1	0	0	Gosia dlatego tak powiedziała, bo tego jedzenia nie lubi, może koleżanka za nią by zjadła	1	0	0	3	1	1	1	1	3	6
38	PL-KW-001	bo się z niego wysmiewał, bo wyał sok i był trochę zły	0	0	0	bo nie była z tego szczęśliwa	1	0	0	bo nie lubi szpinaku	1	0	0	2	0	2	2	1	5	7
10	PL-MST-001	Bo nałobuzował.	1	0	0	No że mają pecha, a nie szczęście. Tak się mówi, na przykład... Idziesz, idziesz, już jest autobus, a nagle ci odjeżdża. I mówisz. Taki jeden przykład. Albo że się w coś gra i pewnie to jest zbyt trudne... Fajnie by było, gdyby to była cała wyspa, na przykład, gdy ktoś płynie jakimś statkiem (?), że będzie cała wyspa, ale znając moje szczęście, to będzie jakaś wysepka.	1	0	1	Na przykład często to je, ale w ogóle tego nie zjada nigdy.	1	0	0	3	1	1	1	0	2	5
8	PL-MST-002	Dlatego, że się na niego zdenerwował, że zabrudził nowy [jał?] obrus	1	0	0	Dlatego, że nie zdążyli na autobus i była zdenerwowana, że będą musieli wracać w deszczu.	1	0	0	Dlatego, że powiedziała tak w przenośni, a to wcale nie było jej ulubione jedzenie, tylko go strasznie nie lubi.	1	0	1	3	1	2	2	3	7	10
9	PL-MST-003	Bo na przykład ten brat, który wylał, nigdy czegoś takiego nie zrobił i... Na przykład ktoś kupił obrus i ten obrus był na przykład bardzo ładny i ten chłopiec go oblał... I wtedy brat powiedział... "Dlaczego wylałeś"? ("Świetne się spisałeś.") I wtedy tamtemu było tak głupio, że wylał. No i na przykład wtedy tamten się śmiał, że tak... świetnie się spisałeś.	1	1	1	Czasami, jak ludzie mówią, że "dziś naprawdę mamy szczęście", czyli, to znaczy, że "naprawdę mieliśmy pecha".	1	0	1	(!) Bo ona lubi to jedzenie... Ale Gosia to jest ta, co powiedziała, że nie lubi? (Znaczy Gosia nie mówiła nic, ale nie lubi szpinaku. Ale powiedziała "O, moje ulubione jedzenie") Że może nie je tego, bo może tu jakieś jest niedobre, a w domu na przykład je. Bo dobre jest.(!	Cieszy się z obiadu.	0	0	2	0	1	1	0	2	4
6	PL-MST-004	No, dlatego, no bo... Tak jakby to powiedział w cudzysłowie. Tak samo, jakby ktoś komuś powiedział, że... Ktoś powiedział "Znalazłem łopatę!", a ona była centralnie przed nim, to ktoś może w cudzysłowie powiedzieć "Brawo! Udało ci się znaleźć łopatę, która była strasznie trudno ukryta."	1	0	0	No bo tak... To samo, co z tą pierwszą historyjką. To w cudzysłowie.	1	0	0	Znowu w cudzysłowie.	1	0	0	3	1	3	3	3	9	12
7	PL-MST-005	Bo, no, złośliwie powiedział, bo "świetnie się spisałeś" niektórzy mówią... No bo na przykład w mojej klasie się mówi, że jeżeli Kasia często wrzeszczy, kiedy pani powiedziała, że żeby wyjść na dwór, to trzeba być cicho, to wtedy pani mówi, że nie wychodzimy na dwór, to wtedy my mówimy "Kasia, świetnie się spisałaś".	1	0	0	Bo to takie złe szczęście. Czyli że nie szło nic po ich myśli.	1	1	1	Powiedziała tak, bo się... "Moje ulubione jedzenie" to było tak, jak... To było takie ulubione z najgorszych, a to było jedyne najgorsze.	1	1	1 (dla szpinaku nie była miła, ale dla reszty była średnio miła)	3	1	2	1	1	4	7
1	PL-NBJ-001	bo to było ironiczne	1	0	0											3	0		3	3
34	PL-NBJ-003	Bo się zdenerwował	1	0	0	Nie wiem	1	1	1	żeby nie obrzydzać jedzenia i żeby na przykład nie zrobić przykrości rodzicom	1	1	2	3	1	2	0	0	2	5
5	PL-OZ-001	Bo rozlał kubek soku	1	1	1	Bo im odjechał autobus	1	0	1	Bo jej to nie sakowało	1	0	1	3	1	0	0	1	1	4
3	PL-OZ-002	Ale, jak dlatego, że się świetnie spisał? Dlatego, że wylał	1	0	0	Że mają szczęście? Że nie pojechali autobusem?	1	0	0	Że to jest jej ulubione jedzenie? To przeciesz ten chłopak tak powiedział, że to jego ulubione jedzenie, chłopak tak powiedział. ( Po powtórnym przeczytaniu historyjki) bo lubi to jedzenie	1	1	1	3	1	0	0	0	0	3
4	PL-OZ-003	Bo wylał sok, Saarkkastycznie mu to powedział	1	1	1	Bo deszcz zaczął padać i to był sarkazm	1	1	1	Bo to był sarkaz i nie lubiła szpinaku	1	2	1	3	1	3	3	3	9	12
11	PL-OZ-004	Bo był zły	1	0	0	Bo była zła	1	0	0	Żż powiedziała dlatego żeby koleżanka pewnie to zrozumiała i pewnie tego ta Gosia, nie lubi tego. Pewnie sobie tak pomyśli i tyle	1	0		3	1	2	2	2	6	9
37	PL-OZ-005	Dlatego,że był na niego zły, ze wylał sok	1	0	0	Bo im uciekł autobus i zaczęło padac	1	1	1	No dlatego, że nie lubiła no tego co mieli do jedzenia umh, no poprostu	1	1	1	3	1	2	1	1	4	7
35	PL-ZL-001	Był zły, bo zmieniał wcześniej obrus.	1	2	2	Była zła. Czasem mówi się co∂ miłego, a wcale nie ma się tego na myśli.	1	2	1	Bo chciała udawać orzy koleżance, że lubi, bo ta koleżanka mogła lubić szpinak.	0	1	0	2	0	2	1	0	3	5
36	PL-ZL-002	Bo był to nowy obrus, a z takiego trudno zmywa się plamy.	1	2	2	Bo była zła, że uciekł jej autobus.	1	2	2	Dlatego, bo okłamała koleżankę, żeby nie myślała, że ona nie lubi warzyw.	1	2	1	3	1	1	2	0	3	6
12	PL-ZP-001	No dlatego, że „świetnie się spisałeś”, bo niektórzy ludzie mówią że „świetnie się spisałeś” tylko w odwrotnym sensie. Czyli, że „świetnie się spisałeś” czyli że, co ty zrobiłeś, na przykład.	1	0	1	No dlatego, że miał szczęście w sensie odwrotnym, że nie mieli szczęścia, dlatego że nie mieli szczęścia, bo spieszyli się a pociąg odjechał.	1	0	1	No bo chciała się dowiedzieć czy ta druga dziewczynka je?	1	1	1	3	1	1	1	0	2	5
13	PL-ZP-002	Że świetnie się spisał, że świetnie… to jest takie na odwal… że świetnie się spisałeś, czyli że „no super. Wylałeś sok.”	1	0	0	Że mieli bardzo wielkie szczęście, że najpierw zaczął padać deszcz a potem im odjechał autobus.	1	1	1	Powiedziała tak, żeby nie zasmucić koleżanki.	1	0	2	3	1	1	0	0	1	4
14	PL-ZP-003	Na przykład, że dał mu sok do picia a on niechcący wylał i tak się mówi. Na przykład gdy ktoś wygra to świetnie się spisałeś, albo gdy właśnie coś zrobi takiego „o”, że ktoś coś da i na przykład, na przykład moja koleżanka ostatnio kupiła sobie loda i ten lód jej upadł na ziemie i miała tylko rożek i też wtedy do niej powiedziałam „świetnie się spisałaś”.	1	1	1	To jest to samo co w drugiej części… że tak na przykład... że tak się mówi, bez przeczenia nie. Na przykład nie mamy dziś szczęścia, to na przykład mamy dziś szczęście.	1	1	1	Ja też tak czasem mówię, na przykład na... też na szpinak, bo nie znoszę szpinaku, chyba, że w lazanii. Albo na przykład...No, to się po pierwsze mówi tak: „no, moje ulubione jedzenie”. Tak, z takim jakby zdenerwowaniem, albo z takim… fochem.	1	1	1	3	1	1	1	1	3	6
15	PL-ZP-004	Bo był… tak ironicznie.	1	0	0	Ironicznie, dlatego, że nie zdążyli na autobus i zaczął padać deszcz. I chodzili w deszczu.	1	0	0	Ironicznie.	1	0	0	3	1	2	3	3	8	11
16	PL-ZP-005	Będzie brat od nowa musiał prać obrus.	1	0	0	Bo następny autobus może być dopiero za godzinę.	1	0	0	Bo lubi szpinaku	0	2	1	2	0	1	1	0	2	4
17	PL-ZP-006	Bo był niezadowolony z tego, co zrobił Krzyś.	1	0	0	No bo jest takie powiedzenie, że jak dziś naprawdę mamy szczęście, to tak tylko mówimy, a tak nie myślimy. No że inaczej to jest.	1	0	0	Bo nie lubi tego szpinaku i też tak chce to powiedzieć.	1	0	0	3	1	2	1	1	4	7
18	PL-ZP-007	Bo… bo mówił to z ironią? Dlatego, że… dlatego, że jak… że jak wylał sok… jak ten młodszy brat wylał sok, to... na czysty akurat obrus, to mógł być ten starszy brat zagniewany, że akurat wylał sok na czysty obrus.	1	1	0	Dlatego, że też mówiła to z ironią… bo autobus im odjechał akurat wtedy, kiedy zaczął padać deszcz.	1	1	0	Dlatego, że nie lubi tego dania. I powiedziała też to z ironią, bo nie lubi szpinaku, a akurat dzisiaj był na obiad.	1	0	0	3	1	3	3	1	7	10
19	PL-ZP-008	No bo pewnie… nalał mu sok, to oczekiwał teraz od niego szacunku – że on go z szacunkiem wypije i mu no odda a nie wyleje go.	1	0	0	No bo, bo była zła i chciała powiedzieć to z ironią.	1	0	0	No bo tak samo – ironia.	1	0	0	3	1	1	3	3	7	10
20	PL-ZP-009	Dlatego, że myślał, że ten brat od niego, ten młodszy… powie wszystko mamie i... i powie, że brat wylał sok, i że… a tak nie było. I znów dostanie kare, a nie był on niczemu winny.	0	0	0	Dlatego, że na przykład mogło być coś przed tym, że się tej mamie nie udało, na przykład ten Krzyś zrobił coś niegrzecznego w przedszkolu, pani o tym wszystko powiedziała i dlatego był niemiły dzień, a może jeszcze w pracy tej mamie się nie udało coś i dlatego... i jeszcze teraz ten autobus odjechał i po prostu powiedziała… jak to powiedziała? (…) I powiedziała to takim tonem że no: „dziś naprawd…	1	1	1	Bo mówiła, że „moje ulubione jedzenie” - czyli mówiła że… czasami tak się mówi, na przykład: „super. Moje ulubione jedzenie” na przykład jak ktoś nie lubi na przykład tego szpinaku, to mówi: „najlepszy obiad na świecie”.	1	0	1	2	0	1	1	1	3	5
21	PL-ZP-010	Bo wylał sok?	1	0	0	Bo autobus nie podjechał i zaczął padać deszcz.	1	1	1	Bo nie lubi?	1	0	0	3	1	0	0	1	1	4
22	PL-ZP-011	Bo wylał szklankę na czysty obrus.	1	0	0	Że na szczęście nie ma burzy tylko jest taki deszczyk tylko.	0	1	1	Żeby tamta dziewczynka się z niej nie śmiała, że nie lubi tego szpinaku.	1	0	1	2	0	0	0	0	0	2
23	PL-ZP-012	No bo na pewno się przyznał.	0	1	2	Dlatego no bo.. słońce może wszło.	0	1	2	No bo chciała, żeby one były takie same no i żeby były przyjaciółkami najlepszymi.	0	0	1	0	0	0	0	0	0	0
24	PL-ZP-013	Bo świetnie pobrudził stół.	0	0	2	Bo mieli farta, że pada deszcz.	1	0	2	Żeby zaimponować koleżance.	0	0	2	1	0	0	0	0	0	1
25	PL-ZP-014	Dlatego bo powiedział tak odwrotnie, bo czasem się tak mówi	1	0	0	Mama powiedziała odwrotnie.	1	1	1	Bo to nie jest jej ulubione jedzenie	1	1	0	3	1	1	1	1	3	6
2	PL-ZS-001													0	0				0	0
	PL-KKK-001	Bo on bardzo źle zrobił	1	0	0	Bo pada deszcz bardzo mocno, a ten autobus już się zamknął	1	0	0	Bo ona w ogóle nie lubi szpinaku	1	0	2	3	1	1	0	1	2	5
	PL-KKK-002	Tak ze złości	1	0	0	Że teraz muszą na piechotę wracać do domu w tym deszczu.	1	0	0	Tak do tej koleżanki powiedziała po prostu, że naprawdę nie lubi.	1	0	0	3	1	2	1	1	4	7
	PL-KKK-003	Dlatego, że był zły, bo był czysty obrus.	1	0	0	To też była ironia. Powiedziała tak, bo autobus jej odjechał, gdy się spieszyła.	1	1	1	Ironicznie.	1	1	1	3	1	2	3	3	8	11
	PL-ZL-003	Dlatego bo wylał na obrus sok	1	2	2	Bo w ogóle nie mają szczęścia. Mamie chodzi o cudzysłowie	1	1	2	Gosi chodziło o cudzysłów, chodziło jej, że nie cierpi tego obiadu.	1	2	1	3	1	0	3	3	6	9
	PL-ZL-004	Sądziłm że tak powie Krzysiowi żeby więcej tego nie robił , chciał to powiedzieć niemiło, za karę, że to zrobił	1	2	2	Bo była nieszczęśliwa, powiedziała niby dobrze, ale takim tonem, że miała na myśli, że nie mają szcześcia.	1	2	2	Bo nie lubi szpinaku. Chciała wyrazić jak bardzi go nie lubi, żeby obrzydzić kolrżance jedzenie. Zeby koleżanka zrozumiała, że ona bardzo tego nie lubi.	1	2	1	3	1	2	2	1	5	8
	PL-OZ-006	Ee, no bo zrobił plamę na czystym obrusie	1	0	0	Mh,No bo to tak jakby, powiedziała że nie, że tak nie znaczy to.	1	0	1	No bo lubi te jedzenie	0	0	2	2	0	1	1	0	2	4
	PL-OZ-007	Bo wylał sok	1	0	0	Bo chciała to powiedzieć jako przeciwieństwo,że mamy,poprostu przeciwieństwo chciała powiedzieć	1	0	0	No bo dla niej to było najgorsze jedzenie jakie może być	1	1	0	3	1	0	1	0	1	4
	PL-OZ-008	Bo może się bał, że mama je okrzyczy,że oblali nowy obrus czy coś takiego, znaczy nie wiem, czy nowy..	1	0	0	Bo może spotkali jakiegoś kolegę, koleżankę, która ich np. podwiozła, albo zobaczyli,że nowy bus jedzie to ich może podwiózł by	1	1	2	Bo może szpinaku nie lubi?. Ja też szpinaku nie lubię	1	0	0	3	1	2	0	0	2	5
	PL-ZS-002	Bo starsi braci są zawsze tacy psotni	1	0	1	Tak jakby w żarcie powiedziała, bo to nie był zbyt fajny dzień, bo padał deszcz, a autobus odjechał	1	0	2	Miała na myśli, dlatego że to było jej najgorsze jedzenie	1	1	1	3	1	1	2	1	4	7

## Sheet: SAS
Lp.	code	PL	comprehension		A. conceptual role taking						B. empathetic sensitivity		C. person perception	alternative explanation	comprehension		conceptual role taking						empathetic sensitivity		person perception	alternative explanation	sum_comprehension	sum_conceptual role taking	sum_empathic sensitivity	sum_person perception	sum_alternative explanation
			1. Czy nowa dziewczynka widzi jak Ola i Ania trącają się i uśmiechają się do siebie?	2. Czy nowa dziewczynka rozmawiała kiedykolwiek z Olą i Anią?	1. Dlaczego Ola uśmiecha się do Ani?	2. Dlaczego Ania kiwa głową?	3a Dlaczego Ola i Ania ruszają w stronę dziewczynki?	3b Dlaczego tak myślisz? Skąd to wiesz?	4a Czy nowa dziewczynka wie, dlaczego Ola i Ania ruszają w jej stronę? TAK/NIE	4b) Skąd wiesz, że nowa dziewczynka wie/nie wie, dlaczego Ola i Ania ruszają w jej stronę?	5a) Jak myślisz, jak czuje się nowa dziewczynka?	5b) Dlaczego? Czy jeszcze jakoś się czuje? Dlaczego?	6. Wybierz z historyjki jakąś osobę i opisz ją. Jak możesz ją opisać? Jak myślisz, jaką jest osobą?	7. Czy możesz sobie wyobrazić tę historyjkę jakoś inaczej? TAK/NIE Jeśli tak, jak?	1. Czy Tomek widzi jak Marek i Kamil mrugają do siebie i uśmiechają się? TAK/NIE	2. Czy Tomek jest zazwyczaj wybierany do drużyn sportowych jako pierwszy? TAK/NIE	1. Dlaczego Marek uśmiecha się do Kamila?	2. Dlaczego Kamil kiwa głową?	3a Dlaczego Kamil i Marek wybierają Tomka do swojej drużyny?	3b Dlaczego tak myślisz? Skąd to wiesz?	4a. Czy Tomek wie, dlaczego Kamil i Marek wybierają go do swojej drużyny? TAK/NIE	4b Skąd wiesz, że Tomek wie (albo nie wie) dlaczego dlaczego Kamil i Marek wybierają go do swojej drużyny?	5a) Jak myślisz, jak czuje się Tomek?	5b) Dlaczego? Czy jeszcze jakoś się czuje? Dlaczego?	6. Wybierz z historyjki jakąś osobę i opisz ją. Jak możesz ją opisać? Jak myślisz, jaką jest osobą?	7. Czy możesz sobie wyobrazić tę historyjkę jakoś inaczej? TAK/NIE Jeśli tak, jak?
1	PL-AK-001	reply	Tak	Nie	Chce ją przeprosić, ona chce się bawić, ale ona ją trącała i jej dokuczała, uśmiechem chciała ją przeprosić	Wybacza jej, ale nie całkiem	Chciały się z nią pobawić i zapoznać	Te dwie dziewczynki myślały, że mogłyby fajnie się razem bawić, żeby się nie nudziła, nie była smutna i nie czuła się samotna	Nie	Wstydzi się ich, wstydzi się zapoznać, też tak mi się dzieje, jak ktoś przychodzi się zapoznać	Wstydzi się	Jest tu nowa i nie zna ich jeszcze, nie wie czy się z nimi zapoznać czy nie	Nowa dziewczynka jest wstydliwą osobą. Jest ogólnie podobna do mnie. Chce się pobawić, ale trudno jej się zapoznać z innymi koleżankami	Ola i Ania nie będą się kłócić tylko podejdą i spytają jak ma na imię. Zaczną się bawić, będą koleżankami, ta nowa dziewczynka nie będzie się już wstydzić i nie będzie myśleć, że nie ma koleżanek i jest sama	Tak	Nie	Dlatego, że oni tak nie mówiąc do siebie ze sobą rozmawiają czy go wziąć czy nie	Chce go wziąć do drużyny, ale chyba jednak nie chce	Szukają kogoś, kto by z nimi zagrał	Bo nie mają z kim grać, bo jest ich tylko dwoje	Nie	Bo oni nie rozmawiają głośno, tylko mrugają i mówią swoim językiem	Zawstydzony	Dziwnie się czuje, że go wybrali jako pierwszego, a on ich jako ostatnich	Tomek jest zawstydzony, jest mu głupio, że oni go wybrali.	Kamil i Tomek[raczej chodziło o Marka] byli niezbyt sympatycznymi kolegami, nie chcieli się bawić, ale jak doszedł do ich klasy Tomek (odzedł od tej klasy, bo się przeprowadziili, ale później wrócił, bo ten dom okazał się dziwny), no to już potem zaczęli się bawić. Kamilowi niezbyt było miło, że się nie bawią razem. A Marek później pomyślał, że przyjdzie do Kamila, a nie spodziewał sie, że Kamil …
		score	1	1	2	2	2	3	0	2	2	2	2	3	1	1	2	2	1	1	0	1	2	2	2	3	4	18	8	4	6
2	PL-AK-002	reply	Tak	Nie	Bo ją lubi	Zgadzała się na coś	Bo chcą się z nią zaprzyjaźnić	Wtedy mogłyby razem chodzić na plac zabaw	Nie	Bo nie wiedziała, że chcą się z nią zaprzyjaźnić	Szczęśliwa	Bo dziewczynki do niej podeszły	Nowa. Ma czarne włosy, czerwoną sukienkę, jest uśmiechnięta, kiwa się na huśtawce [jaką jest osobą?] Jest dobrą osobą. [a jak się może czuć?] Czuje się dobrze. [A może jest bardziej otwarta, nieśmiała?] Jest otwarta.	Nowa dziewczynka na huśtawce mogła być koleżanką Oli, a ta inna byłaby dziewczynką na huśtawce.	Tak	Nie	Śmieje się z czegoś	Nie chce Tomka do drużyny	Bo był jako ostatni do wybrania	[domyślnie: z tekstu]	Nie	Ten kolega może być fajny i chcą się z nim zaprzyjaźnić	Szczęśliwy	Bo zawsze zostaje ostatni do wybrania do drużyny	Marek ma rude włosy, jest fajnym kolegą, ma fioletową koszulkę i granatowe spodnie. [jaką jeszcze jest osobą?] -> Lubi sport.	Tomek byłby zawsze wybierany jako pierwszy do drużyny [i co wtedy by się stało? Wybraliby go?] -> Tak.
		score	1	1	2	2	2	1	0	2	2	1	1	1	1	1	1	2	1	1	0	2	2	2	1	1	4	16	7	2	2
3	PL-AK-003	reply	Tak	Nie	Bo się lubią	Bo np. jedna mogła lubić, a druga nie	Bo chcą się np. zaprzyjaźnić się	Może chcą się pogodzić	Nie	Widać na obrazkach [a jakbyś przypomniał sobie z historyjki, jak Ci się wydaje?]-> że nie wie	Może się lepiej czuć, bo ma nowe przyjaciółki	Czuje jeszcze przyjaźń	Dziewczynkę w różowym. Ona chce mieć więcej koleżanek. Jest miłą osobą	Ona nie chciała się zaprzyjaźnić z tamtymi dziewczynkami, a one chciały i się pokłóciły	Tak	Nie	Żeby go wziął do drużyny [ przypomnienie imion bohaterów] ->Żeby wybrali tą osobę, będą mieć więcej piłkarzy	Nie chce iść do ich drużyny [Przypomnienie imion bohaterów]-> On żeby nie poszedł do ich drużyny.	Bo on np. może być dobry w piłkę nożną	Bo np. oni mogą być troszeczkę słabsi i chcą dobrego zawodnika w swojej drużynie	Nie	Jak się wybiera to się nie wie kto chce go wziąć. Zawsze jest tak, że wszyscy kogoś chcą, ale jak zostanie ostatnia to musi dojść do tej osoby	Może się czuć uszczęśliwiony	Bo ktoś go wziął do drużyny i lubi tych chłopców	Chłopczyk z piłką w ręce. Ten chłopczyk może chciał wziąć Kamila, a drugi nie chciał, a Kamil chciał, żeby poszedł do ich drużyny, bo ma dużo kolegów w te druzynie. Drugi chłopczyk mógł nie chcieć go w drużynie, ale Tomek już powiedział, żeby on poszedł do ich drużyny i nie mieli innej propozycji	Ten drugi chłopczyk by nie chciał go mieć <domyślnie: w drużynie> i by się obraził i mecz albo wf mógłby być odwołany i wtedy wszystkim by było przykro, że nie mogli zagrać ze wzgledu jednej osoby. Potem grali i ktoś kogoś sfaulował i nie mieli jednego zawodnika i musieli grać bez jednego zawodnika
		score	1	1	2	2	2	2	0	1	2	0	1	3	1	1	2	1	2	2	0	1	2	2	2	2	4	17	6	3	5
4	PL-AK-004	reply	Tak	Nie	Bo są siostrami	Bo się przyjaźnią	Bo nigdy z nią nie rozmawiali, a chodzili z nią do klasy	Chcą sie zaprzyjaźnić	Nie	Nie znała ich	Zestresowana	Bo nigdy z nimi nie rozmawiała	[niezrozumienie zadania, podanie przykładu przez osobę badaną]-> Jest bardzo dobra, bo siostra jak jej coś zrobi, to zaraz się z nią pogodzi i potem mogą działać razem	Np. Ola podłożyła nogę Ani, potem wstała i się przytulili, zauważyli pieska i pobiegli do mamy zapytać się czy mogą.	Tak	Chyba tak	Bo są przyjaciółmi	Może Tomek jest świetny w piłkę?	Bo był ostatni	Z historyjki	Tak	Kiwali głową	Szczęśliwy	Bo był najlepszy	Marek jest ...[jaką ma cechę?] -> Ma cechę szczęśliwą, bo się uśmiechał do Tomka z Kamilem	Tomek i Kamil grali w piłkę, to chcieli wybrać jednego zawodnika do siebie. Było ich trzech i wybrali Tomka, bo do niego się uśmiechali. [może jeszcze jakaś zmiana?]-> Jak już skończył się mecz to wygrali.
		score	1	1	2	2	2	2	0	2	2	1	2	2	1	0	2	1	1	1	1	1	2	1	1	1	3	17	6	3	3
5	PL-AK-005	reply	Tak	Nie	Bo się lubią	Żeby iść do nowej koleżanki	Żeby się poznać razem, bo są w klasie	Żeby się trzymali razem, żeby było im raźniej	Tak	Idą, żeby się pobawić	Wesoło	Widzi, że inne dzieci chcą się z nią bawić	Ola jest osobą śmiałą, żeby się bawić i żeby pomóc komuś, jak ktoś nie będzie miał humoru w jakiś dzień.	Np. Ola i Ania chciały się z kimś pobawić i zobaczyły jakąś dziewczynkę i nie miała dobrego humoru, więc chcieli się razem bawić. [może coś jeszcze?]-> Później po zabawie poszli na lody	Nie	Nie	Bo znaleźli jakiegoś chłopczyka, żeby go zabrać do drużyny	Żeby go zabrać do swojej drużyny	Bo nie było innego, on był sam	Bo Tomek był ostatni i nikogo już nie było	Nie	Bo jeszcze ich nie znał	Wesoło	Bo ktoś go wybrał	Kamil jest osobą śmiałą, żeby zabrać ich do drużyny, żeby współpracowali i sobie razem pomagali. [A jaką jeszcze ma cechę?]->Kamil ma cechę bramkarza. [Jeszcze jakąś ma cechę? Np można był miłym, przyjacielskim, pomocnym] Jest miły, prrzyjacielski i śmiały.	Kamil i Marek szli, zobaczyli jak ktoś gra na boisku w piłkę nożną i zobaczyli, żeby go zabrać do drużyny.
		score	1	1	2	1	2	2	1	1	2	2	3	1	0	1	2	2	1	1	0	2	2	2	1	2	3	17	8	4	3
6	PL-AK-006	reply	Tak	Nie	Bo jest nowa koleżanka w jej klasie. (...) Cieszą się, że w ich klasie jest nowa koleżanka	Żeby tam podejść	Żeby z nią porozmawiać	Chcą ją trochę poznać	Nie	Bo zastanawiała się, co Ola i Ania od niej chcą	Podekscytowanie	Bo chce się dowiedzieć, co Ola i Ania od niej chcą	Ania jest miłą, ciekawą osobą. [Po czym to poznajesz?]-> Bo chciała podejść do nowej dziewczynki.	[brak odpowiedzi, powrót później, po przykładowej odpowiedzi badającego]-> Dziewczynki mogłyby jeszcze chwilę zaczekać i pooglądać dziewczynkę, zanim do niej podeszły. Później ta dziewczynka sama mogłaby do niej podejść.	Tak	Nie	Bo Tomka chce do drużyny	Dlatego, że w ten sposób chce Markowi pokazać, że on będzie w tej drużynie	Bo był jednym z ostatnich dzieci, które zostały	Dlatego, że zwykle jest ostatni do wybrania	Nie	Zawsze był wybierny jako ostatni, a tym razem nie	Szczęśliwy	Bo jest w drużynie	Kamil jest miły i podekscytowany. [ dlaczego?]-> Podeskcytowany dlatego, że był ciekawy jak Tomek będzie grał w ich drużynie. A miły, bo wziął Tomka do drużyny.	[odpowiedź po przykładowej odpowiedzi badającego] -> Zanim wzięli Tomka mogli się zastanawiać czy go wziąć czy kogoś innego. I w końcu wybrali Tomka.
		score	1	1	2	1	1	2	0	2	2	2	1	1	1	1	2	2	1	1	0	1	2	2	2	1	4	15	8	3	2
7	PL-AK-007	reply	Tak	Nie	Bo widzą nową koleżankę	Zgadza się, np. jej siostra, że będą miały nową koleżankę	NA	NA	Nie	Nie mogła rozpoznać, co one chcą od niej, bo tylko się na nią patrzyły	Fajnie	Bo będzie miała nowe koleżanki	Nowa dziewczynka ma krótkie czarne włosy, czerwoną sukienkę na szelkach i huśta się na huśtawce. Jest dobrą, szczęśliwą osobą, bo jest uśmiechnięta.	Ola i Ania zobaczyły nową dziewczynkę i poszły się razem bawić na huśtawkę.	Tak	Nie	Że będą mieli osobę, która będzie z nimi grała	Bo może oni to sobie powiedzieli, że on będzie z nimi w drużynie i on kiwał głową, że tak	NA	NA	Nie	Bo zawsze był ostatni, a oni go wybrali jako trzeciego	Fajnie	Bo go wybrali do drużyny	Marek ma czarne, krótke włosy, ma piłkę. Jest szczęśliwy, bo wzięli do drużyny nowego kolegę. Jest miły, go wzięli go do drużyny.	Oni potem grali w piłkę i wygrali. [a zanim?] -> Bardzo się polubili z innymi kolegami.
		score	1	1	1	2	0	0	0	2	1	2	1	1	1	1	2	2	0	0	0	1	1	2	2	1	4	10	6	3	2
8	PL-AK-008	reply	Tak	Nie	Bo myśli, że to jest niechcący <niechcący ją potrąciła>	Że może ta powiedziała, żebyśmy do niej poszli	Chcą się zaprzyjaźnić	Bo jest nowa w ich klasie, więc chcą się zaprzyjaźnić	Nie	Uważnie słuchałem	Dziwnie	Nie wie po co one tu biegną	Nowa dziewczynka jest osobą dobrą, łagodną, szczęśliwą	One mogły iść z górki i mogły się przewrócić. Albo przyszły i się z nią zaprzyjaźniły	Tak	Nie	Bo już wiedzą kogo wziąć do drużyny	Potwierdza głową	Bo dobrze gra	Bo jak jest wybierany do drużyn sportowych, to chyba dobrze gra	Nie	Nie wiem. Może dlatego, że ostatni mecz był bardzo dawno	Dziwnie	Dlatego, że nie wie po co oni tak do siebie robili <w domyśle: mrugali i uśmiechali sie>	Tomek jest dobry, uczciwy. [dlaczego tak myślisz?] -> Mógł grać w wielu meczów i podczas tych meczów to inna drużyna zdobywała punkty i wygrywała	On mógł grać w piłkę, a oni go zauważyli i chcieli go wziąć do drużyny
		score	1	1	1	1	2	2	0	1	1	2	1	1	1	1	2	2	1	1	0	1	2	2	1	2	4	14	7	2	3
9	PL-ZP-001	reply	tak	nie	Dlatego, że chciały poznać nową dziewczynkę?	Chciały ją poznać?	Bo chciały ją poznać	Bo chciały się zaprzyjaźnić	nie	nie wiem	fajnie, bo chciały się zaprzyjaźnić/ może czuć, że poznała dziewczynki	bo chciały się zaprzyjaźnić	Ma czarne włosy, huśta się. Myśli że chcą się zaprzyjaźnić się; czuje że może być fajna.	Poszła i zauważyła huśtawkę i się bujała nogami.	tak	nie	Chce go wziąć do drużyny czy może lubi go?	Bo chce go wziąćdo drużyny	Bo może trenował z tatą, postarał się	Bo jest taka historyjka	brak	nie	Wie, że jest prawie ostatni ale wie że też się postawał i dlatego go wybrano.	Czuje, bo jest wybierany przez tych chłopców i wie, że będzie wybrany, bo się postarał i bardzo chce	On stoi z piłką; myśli, że chce o coś zapytać tego ostatniego chłopca.	Może nie stał z piłką i może pobiegł sobie i zaczął grać sam.
	PL-ZP-001	score	1	1	2	2	2	2	1	0		2	2	1	1	1	3	2	2	1	0	0		2	2	1	4	17	4	4	2
10	PL-ZP-002	reply	tak	nie	Bo są koleżankami	Żeby powiedzieć tak, bo nie było to powiedziane.	Bo chcą się z nią zaprzyjaźnić.	Że nie było po prostu innej opcji	nie	Bo by do nich pomachała albo podeszła.	Dobrze.	Zadowolona może, że ktoś się z nią zaprzyjaźnił.	Nowa dziewczynka; jest nieśmiała, bo jest nowa i chciałaby się z kimś zaprzyjaźnić pierwszego dnia.	nie	tak	nie	Że jest zadowolony, że go wybrał.	Że tak, że się zgodził, żeby go wziął do drużyny.	Żeby się nie czuł samotnie.	Żeby z kimś jednak był w drużynie.	nie	No bo zazwyczaj nie jest wybierany.	Dobrze i zadowolony.	nie.	Tomek, myślał, że go nie wybiorą tak jak zawsze do drużyny, a jednak się okazało, że go wybrali i że jest zadowolony, że mógł być w drużynie jakiejś; jest osobą rzadko wybieraną.	nie
	PL-ZP-002	score	1	1	1	1	2	1	1	1	1	2	3	0	1	1	2	1	2	1	1	1	2	0	3	0	4	15	5	6	0
11	PL-ZP-003	reply	tak	nie	Bo chcą poznać nową dziewczynkę.	Wyraża zgodę, żeby tam poszły.	Chcą ją poznać.	Jeśli ktoś chce kogoś poznać, to na przykład podchodzi do tej osoby i mówi: część, jak się nazywasz? Bo ja na przykład Ania.	nie	Bo było tak napisane w tekście.	Podekscytowana	Radośnie, że chcą ją poznać.	Nowa dziewczynka, miała czerwoną bluzkę, czarne łosy, zapewne lubiła huśttać się na huśtawce, bo się huśtała… miała biały sweterek, białą skórę… [jest osobą] dobrą, na pewno radosną.	nie	tak	nie	Mówi mu w taki sposób, że chce go wybrać.	Bo się na to zgadza.	Bo wiedzą, że zawsze był wybierany jako ostatni, a tutaj jest wybierany jako trzeci; chcą zroobić żeby poczuł się fajnie, bo chcą się zaprzyjaźnić	Że tak chętnie podchodzą i mówią a nie na przykład „cześć, chcesz być z nami w drużynie	nie	Bo na pewno nie rozumie ich znaków, kiedy się do siebie uśmiechali	wspaniale	szczęśliwie, że został wybrany jako trzeci, a nie jako ostatni.	Tomek, ma zielony długi rękaw, czy zielony golf, jeansy, szare buty, czarne włosy… i tyle. [jest osobą] fajną, bo jeśli ktoś chce go wybrać, to ce go poznać, bo… bo nie wiem.	nie
	PL-ZP-003	score	1	1	2	1	2	3	1	1	2	2	2	0	1	1	2	1	2	1	1	2	1	1	2	0	4	19	6	4	0
12	PL-ZP-004	reply	tak	nie	Bo przyszła nowa	Żeby do niej podejść	Żeby z nią pogadać.	Bo tak było w tekście.	nie	Bo tak myślę	Zawstydzona	Bo nigdy ich nie widziała i nie zna. [odczuwa] wstyd.	Ania szturchała koleżanki. Jest wesoła.	tak, gdyby dziewczynka widziała kim są; wtedy dziewczynka by się nie wstydziła.	tak	nie	Żeby przyjąć Tomka.	Że się zgadza na przyjęcie Tomka	Bo był samotny.	Bo zawsze jego ostatniego go wybierali.	nie	Z tekstu.	Nie samotny	Wesoły, że nie wybrali go jako ostatniego, ale tak jakby był samotny z drużyny. [czuje się] fajnie.	Tomek był samotny. Ponury. Jest piłkarzem.	Gdyby Tomek został wybrany jako pierwszy; wtedy byłby kapitanem może.
	PL-ZP-004	score	1	1	1	1	1	1	1	2	2	2	1	2	1	1	1	1	2	1	1	1	2	2	2	1	4	14	8	3	3
13	PL-ZP-005	reply	tak	nie	NA	Nie wiem	bo chcą się zaprzyjaźnić	Bo podeszły do niej.	Nie	Bo ich nie zna.	Zadowolona	Że będzie miała koleżanki.	Nowa dziewczynka; zobaczyła, że do niej podchodzą dwie dziewczynki i zobaczyła, że one się znają i chciała się z nimi zapoznać. Jest jajna.	nie	tak	nie	bo chcą go wziąć do swojej drużyny	nie wiem	bo został jako ostatni	bo nikt go nie chciał	nie	bo się nie domyślił	źle	smutny, bo nie chciał go przyjąć do drużyny.	Tomek; dzieci wybierały drużyny, żeby zagrać w piłkę nożną i wszyscy zostali powybierani do drużyn, a Tomek został jako ostatni i Kamil i Marek nie chcieli go wziąć, ale musieli, bo został jako ostatni. Jest niemiły.Krzyczy na wszystkich.	NA
	PL-ZP-005	score	1	1	0	0	2	1	1	2	2	1	1	0	1	1	2	0	1	2	1	2	1	2	2	0	4	14	6	3	0
14	PL-ZP-006	reply	tak	nie	Bo ją lubi	Bo tak wyraża to, że się zgadza.	Żeby ją poznać.	Bo to przecież normalne, że jak chcemy kogoś poznać, to podchodzimy.	nie	Bo ich nie zna. Bo przecież siedzi sama.	Nieśmiała.	Czuje się nieśmiała i samotna, że siedzi sama.	Ola jest zadowolona, że podeszła do niej nowa dziewczynka. Jest miła i chce się bawić.	tak, Ola potrąciła specjalnie Anię i skłamała, że to niechcący	tak	nie	Bo lubi i był miły	bo chce potwierdzić przyjęcie Tomka	Bo dobrze gra w piłkę	Bo tak myślę	nie	No bo się tego nie spodziewał.	smutny	zdziwiony, bo Kamil wybierał samych lepszych od niego, a teraz go wybrał	Marek wybierał słabszych do druyny. Jest fajny. Tomek go lubi	tak, Kamil wybierał lepszyc chłopaków i nie wybrał Tomka
	PL-ZP-006	score	1	1	1	1	1	1	1	1	2	2	2	2	1	1	2	2	1	2	1	2	1	1	2	1	4	16	6	4	3
15	PL-ZP-007	reply	tak	nie	nie pamiętam; no to raczej tak.	Bo rozumie, co Ola do niej chce powiedzieć.	Nie wiem	NA	nie	no bo tak coś czuję.	Przestraszona.	Może być też wesoła. Bo jak nowe dziewczynki do niej podchodzą może być przestraszona i nie wiedzieć co one od niej chcą	Ania; no raczej dobrą. Czuje, że ta nowa dziewczynka nie będzie dla niej zła i niemiła. No i że na przykład jak Ola pozna nowe koleżanki, to wtedy będzie miała nowych przyjaciół, czyli te koleżanki też Oi.	Że na przykład Ola i Ania podeszłyby do nowej dziewczynki i poprosiły ją żeby zwolniły jej huśtawkę.	tak	nie	bo też chce wybrać Tomka	Bo też chce Tomka.	no, nie wiem. Bo może go nie wybierali jeszczce i nie wiedzieli czy on jest bardzo dobry w piłkę, czy nie.	Często jak się do piłki nożnej wybiera osoby, to się raczej wie jak oni grają i wtedy się wybiera najlepszych. A jak nie widzieli jak Tomek gra, to może by chcieli zobaczyć.	nie	Bo mogli mu nic nie mówić czemu go wybierają albo czemu go chcą do swojej drużyny.	Radośnie, bo może pójść do drużyny.	Trochę może się bać, bo jeszcze nigdy nie był w tej drużynie.	Tomek; Marek i Kamil mogli go poznać w trakcie gry w piłkę... i on często jest wybierany końcowo do piłki nożnej i raczej lubi grać w piłkę. [jest osobą] dobrą i miłą.	tak,bo mógł... Tomek i Marek wybrać na przykład kogoś innego, ale wtedy by nie wiedzieli jak… Tomek i Kamil by wybrali kogoś innego, to by nie wiedzieli jak gra Tomek, a może on by grał dobrze i może mógłby wygrać z tamtą drużyna Tomek.
	PL-ZP-007	score	1	1	0	2	0	0	1	2	2	3	3	1	1	1	2	2	2	3	1	3	2	2	2	2	4	18	9	5	3
16	PL-ZP-008	reply	tak	nie	no bo chcą z nią pogadać.	bo ona się zgadza, żeby z nią pogadać.	Żeby z nią pogadać.	Bo przecież się uśmiechały i spoglądały na nią.	nie	No bo było mówione, że ta dziewczynka nie wie czego od niej chcą.	Czuła się samotnie, a teraz będzie szczęśliwa.	No bo jak ktoś cały czas był samotny, to wtedy jak ktoś do niego podejdzie i będą przyjaciółmi, to będzie szczęśliwszy.	nowa dziewczynka; pewnie była w innej szkole, ale tam było dla niej za ciężko i dlatego musiała się przenieść, ale w tej szkole nie miała za dużo przyjaciół. Była osobą wesołą, ale nie w nauce, tylko w zabawie, a teraz znów będzie wesoła.	na przykład, że te dziewczynki zamiast się uśmiechają, to śmieją się z niej	tak	nie	chce żeby on był w jego drużynie.	No bo chce Tomka.	No bo wtedy w ogóle ostatni zawsze był wybierany i chcieli zrobić mu przyjemność, żeby nie czuł się tak zapomniany, że on w ogóle nie może grać.	bo był wybierany jako ostatni.	nie	No bo zawsze było inaczej i jest tym wstrząśnięty.	Dumny z siebie.	Wesoły, bo w końcu ktoś go wybrał.	On na przykład chciał być we wszystkim dobry, ale piłka mu nie wychodziła. I się zamartwiał, bo każdy go wybierał ostatniego. Jest trochę smutny, niektórzy by byli weseli na jego miejscu, bo umie dużo, talentów ma, tylko granie w piłkę mu nie wychodzi, ale on chciał żeby grać w piłkę dobrze mu to wychodziło. Jest osobą cichą w piłce nożnej.	tak, Tomek mógł być wybrany jako ostatni.
	PL-ZP-008	score	1	1	2	1	1	1	1	2	3	2	2	1	1	1	2	2	3	1	1	3	2	1	3	1	4	20	8	5	2
17	PL-ZP-009	reply	tak	nie	dlatego, że zauważyła dzieczynkę na huśtace?	mówi, że możemy tam pójść do tej dzieczynki, albo że… chodźmy tam do niej?	Bo są ciekawe co ona tam robi	No bo jak dziewczynka jest na huśtawce, to oni tak obie idą i myślą, co ona tam robi.	nie	Bo te dziewczynki nie mówiły jej o tym	Odrzucona	Bo te dziewczynki tak stoją i na nią patrzą, śmieją się do siebie, nic do niej nie mówią (...) bo one tak sobie gadają, śmieją się, a do niej ani słowa nie powiedzą.	Ola; ciekawa wszystkiego, [jest osobą] prawie dobrą. Jest ciekawa co ona robi, ale… czyli dobrze, że jest ciekawa, ale źle, że nie powie „co chcesz porobić” tylko się śmieje do koleżanki.	Ola i Ania rozmawiają, nagle zauważają dziewczynkę na huśtawce, znają ją, podchodzą do niej i pytają się czy nie pogra z nimi w berka.	tak	nie	dlatego, że go chce wziąć do swojej drużyny	że może być	Bo zazwyczaj on jest ostatni wybierany	nie wiem; że chcą być dobrzy i chcą go wziąć	nie	Bo nic o tym nie mówili, tylko przyszli i go wzięli.	Jest bardzo ciekawy dlaczego oni go prowadzą, czy na przykład chcą go wziąć, czy inne rzeczy.	Taki… dziwny, bo przychodzi od niego trener chyba i go bierze… tak nie wie do końca czy ma iść, czy nie, bo tak się boi.	Tomek; był taki...nie wiem dlaczego z powodu go nigdy nie zabierają jako pierwsi; chyba z tego powodu, że grał tak brzydziej niż wszyscy… i on był taki… taki zawsze słaby od innych. Byłby osobą taką słabszą.	tak, do tych dwóch trenerów przychodzą i na przykład jest dużo tam osób i wszyscy na przykład bardzo dobrze grali, ale urządzili zawody kto ładniej będzie grał i właśnie ten Tomek wygrał.
	PL-ZP-009	score	1	1	1	1	2	3	1	1	2	3	2	1	1	1	2	1	1	2	1	2	3	3	3	1	4	18	11	5	2
18	PL-ZP-010	reply	tak	nie	nie wiem.	nie wiem,	nie wiem. Bo chciały się zaprzyjaźnić.		nie	nie wiem.	Zdziwiona.	nie wiem.	Ola; [polubiłbym, fajna jest]	tak, ta nowa dziewczynka by poszła do nich, do dziewczynek i ta nowa dziewczynka by się zapytała jak się one nazywają.	tak	nie	nie wiem.	nie wiem.	nie wiem.		nie	bo nie został powiadomiony	Zdziwiony	Że jego wybrali do drużyny	Kamil. Zaprzyjaźniłbym się z nim. Fajny był, na pewno. [co sprawiło, że był fajny?] To że wybrał Tomka do drużyny.	tak, że Kamil by wziął do swojej drużyny; Tomek by wziął Kamila i Marka do swojej drużyny i by byli razem.
	PL-ZP-010	score	1	1	0	0	2	0	1	0	2	0	1	1	1	1	0	0	0	0	1	1	1	1	2	1	4	5	4	3	2
19	PL-ZP-011	reply	tak	nie	zapomniałam	nie pamiętam	że chyba chcą się z nią zaprzyjaźnić	wypadło mi z głowy.	nie	No bo po prostu do niej podchodzą od tak	Niepewnie.	No bo nikt się z nią nie bawi.	Nowa dziewczynka; jak była pierwszy raz to była smutna, że nikt się z nią nie bawi. Smutna.	nie	tak	nie	no bo się lubią.	nie wiem.	Bo już nie ma innych dzieci.	Nie wiem.	nie	bo ci dwaj chłopcy tylko do siebie mrugają i uśmiechają się.	tak zastanawia się o czym oni myślą.	NA	Tomek; był ciekawy co oni mówią i że był smutny, że go ostatniego wybierali.	nie
	PL-ZP-011	score	1	1	0	0	2	0	1	1	2	1	2	0	1	1	2	0	1	0	1	1	2	0	2	0	4	9	5	4	0
20	PL-ZP-012	reply	tak	nie	no bo chce z nią się zaprzyjaźnić.	No bo też chce się zaprzyjaźnić.	Bo chca się zaprzyjaźnić.	Bo byłą nowa i chciały, żeby miała więcej przyjaciół.	nie	no bo jest nowa.	Szczęśliwie	Może zebrać więcej przyjaciół.	nie.	Że podchodzą i pytają się czy możesz… no, jej jest smutno, że nie ma przyjaciół i one chcą jąrozweselić i żeby się zaprzyjaźniła z nimi.	tak	nie	Dlatego, że go wezmą do drużyny piłkarskiej.	Że to dobry pomysł, żeby go zabrać.	Bo jest najczęściej wybierany.	Bo tak było w historyjce	nie	Bo tak było w historii	Szczęśliwie.	Zadowolony jest. Lubi sport i dlatego jest często wybierany.	Ten chłopczyk bardzo często był wybierany do drużyn sportowych bo bardzo dobrze grał. [jest osobą] miłą.	nie
	PL-ZP-012	score	1	1	2	2	2	3	1	1	2	1	0	3	1	1	1	1	1	1	1	1	1	2	1	0	4	17	6	1	3
21	PL-ZP-013	reply	tak	nie	bo jest jej koleżanką	Uważa to za dobry pomysł	Żeby się zaprzyjaźnić.	Bo nigdy ze sobą nie rozmawiały.	nie.	Bo nie było powiedziane.	Nieswojo.	Niespokojnie. Nie wiem.	Ania. Miła. Przyjacielska. I już nie wiem.	Trochę. Nowa dziewczynka mogłaby spaść z huśtawki. Złamała nogę.	tak	nie	Bo go lubi.	Bo popiera pomysł.	Bo chcą.	Nie wiem.	nie	Bo nie wie.	Zdziwiony, bo został wybrany do drużyny.	Zachwyt, bo go wybrali.	Kamil. Wyglądał prawie jak mój brat. I nazywa się tak samo jak mój kolega. I gra dobrze w piłkę nożną. [jest osobą] główną.	Że oni go nie wybrali do drużyny.
	PL-ZP-013	score	1	1	1	2	1	1	1	1	2	1	1	1	1	1	2	1	1	0	1	1	2	3	1	1	4	13	8	2	2
22	PL-ZP-014	reply	tak	nie	Nie wiem	Dlatego, że jest tam nowa dziewczynka.	Bo chcą jej coś powiedzieć.	Bo tak sobie myślę.	nie	Bo tak sobie myślę.	Zdziwiona.	że dziewczynki, których nie zna idą w jej stronę.	nowa dziewczynka; nie wiem. [jest fajna raczej; nie polubiłby jej]	nie	tak	nie	Bo ta osoba może iść do ich drużyny	Bo ta osoba może iść do ich drużyny	Bo jest dobry w piłce nożnej.	Nie wiem,	nie	Nie wiem.	Zdziwiony, że wybierają go do swojej drużyny,	NA	Tomek; zdziwiony	nie
	PL-ZP-014	score	1	1	0	1	2	2	1	2	2	1	1	0	1	1	1	1	1	0	1	0	2	0	1	0	4	12	5	2	0
23	PL-OZ-001	reply	Widzi	Nie	Bo to nowa dziewczynka	Nie pamiętam	Bo chcą się z nią zaprzyjaźnić	Bo ona jest nowa	Nie	Nie pamiętam	Dobrze	Bo się zapozna z nimi i będzie miała koleżanki	Szczęśliwa, wesoła	Nie	Widzi	Nie	Nie pamietam	Bo nie wie dlaczego cały czas go wybierają pierwszego	Dlatego,że są kolegami	NQ	Chyba nie	Bo nie wiedział, że go wybiorą	Fajnie	Bo może być z kolegą w drużynie	Tomek jest fajny bo wybiera kolegów	Nie
		score	1	1	1	0	2	2	0	0	1	3	2	0	1	1	0	0	1		1	1	1	1	0	0	4	8	6	2	0
24	Pl-OZ-002	reply	Tak	Nie	Tego to ja już nie wiem,nie	Nie wiem	Bo chciały się jej zapytać coś, czy mhh nie iem	Tego to już nie pamiętam całkowicie	Nie	Bo patrzyła	Dobrze	Bo ma przyjaciółki	Fajna, lubi poznawać nowych ludzi w szkole, czy co?	Nie	Tak	Nie	Bo go lubi	Nie wem	Bo np go lubią	Nie wiem, nie wiem czy go lubią a więc , tak sądze	Tak	Nie wiem	Dobrze	Bo np. lubi tych chłopaków a oni go wybierają do drużyny	To tą co trzymała piłkę, tylko nie wiem, Kamil bo kojarzy mi się z Kamil Stoch, ma niebieską koszulę jest miły i dalej już nie..	Nie
		score	1	1	0	0	1	0	0	1	1	1	2	0	1	1	1	0	1	0	1	0	1	2	2	0	4	5	5	4	0
25	PL-OZ-003	reply	Tak	Nie	Nie wiem, dlatego bo załóważyła nową dzziewczynkę na huśyawce	Żeby podszedły do tej dziewczynki	Żeby się z nią zaprżyjaźnić	Hm, tak myślę	Nie	Dlatego, że nigdy z nimi nie rozmawiałą i ne zna je zbyt bardzo	Przygnębiona	Dlatego bo dużo osób jej ie zna,czije jeszcze smutek	Tą nową dziewczynkę, spónica czerwona i już, najprostrze, dzieckiem jest ale nie jest rodzaju nijakiego	Tak, trawka, słoneczko, chmurki, chuśyawka na jeziorku	Tak	Nie	Żeby wybrać Tomka do drużyny	Że tak, wybieramy go	Bo jest dobry	Bo uprawia różne sporty	Nie	Dlatego, że nie mówili mu, że będą go wybierać	Dobrze	Bo go przyjęto	Tomek, żłóta koszulka, spodenki i głowa, jest bramkarzem, sportowcem	Ze tomek prośi weźcie mnie
		score	1	1	1	1	2	0	0	2	2	3	1	0	1	1	1	2	2	1	0	2	1	2	1	2	4	14	8	2	2
26	PL-OZ-004	reply	Tak	Nie	Dletego, że Ola czy Ania popchneły się i tak są w jednej klasie bo to są najlepsze przyjaciółki	Kiwa głową dlatego, że bo to są najepsze przyjaciółki i sobie zawsze pomogą, pewnie mają taki znak pomocy	Żeby ją poznać	Bo tak jak z moją koleżanką, z Leną zawsze sobie pomagamy	Nie wie	Dlatego żeby ją poznać i się zaprzyjaźnić	Mh, wstydzi się	Cieszy się, że pozna nowych przyjaciół	Ola, Ola to jest ta co popchneła Anie, Ania jest dziewczynką miłą, fajną, lubi sie pewnie zaprzyjaźniać z ludzmi pewnie bardzo lubi innych, się lubi przyjaźnić bo w ich kraju tak pewnie panuje	Z mojej klasy Ola Luks	Tak, widzi	Nie, nigdy	Marek się uśmiecha do Kamila dlatego, że są najlepszymi przyjaciółmi	Kiwa głową dlatego, że to pewnie ich znak taki	Dlatego,że jest zawsze ostatni, i myśli sobie pewnie dlaczego go wybrali	Dlatego, że to są pewnie troje najlepszych przyjaciół	Nie, nie wie	Dlatego, że mówili sobie, nie, nie mówili	Tomek się czuje dobrze i szcześliwy	Chyba się dobrze czuje, dlatego bo on chyba lubi grać w piłkę nożną	To Tomek jest zawsze pewnie miły, lubi się zaprzyjaźniać, bawić się z innymi i dzielić się z innymi	Tak, że Maciek, Patryk i Antek- dzieje się wszystko tak samo
		score	1	0	2	2	1	1	0	0	2	2	2	0	1	1	0	1	3	0	0	0	2	3	3	0	3	10	9	5	0
27	PL-OZ-005	reply	tak	nie rozmawiała	dlatego,że zobaczyła dziewczynke na huśtawce,której nie znała	Nie wiem	poprostu ją zobaczyły i chciały się zapoznać	NQ	nie	nie wiem	trochę dziwnie, bo wtedy tam nikogo nie znała, więc jest nieśmiała	Nie wiem	No to może tą nową dziewczynkę, taką, która chyba lubi, która umh nie wiem jak ją opisac, no że no nie wiem jak	NQ	tak	nie, jako ostatni	bo widzi tego chłopca i chce go w swojej drużynie	Bo się zgadza	nie wiem	NQ	nie wie	nie wiem	fajnie	bo jest w tej drużynie	to Marek, no taką którą jako ostatnią, którą mniej wszyscy lubią bo chyba jako ostatniego wybierają do jakiejś drużyny	nie za bardzo
		score	1	1	2	0	2		1	0	3	0	0		1	1	2	1	0		1	0	2	2	2	0	4	9	7	2	0
28	PL-MST-001	reply	Tak	Nie	Bo są koleżankami.	Nie, tak albo na przykład	Bo chciały na przykład się poznać i porozmawiać.	Bo nigdy z nią nie rozmawiały i chcą na przykład być koleżankami.	Nie... (po udzieleniu następnej odpowiedzi) Albo może wiedziała	No bo jak ktoś na kogoś patrzy, to bardziej tak myśląc, że, na przykład, chcą o coś zapytać	Bała się.	Mogła sobie pomysleć, że chciały ją zaatakować.	Ola była ciekawska, no bo jak z kimś nie rozmawiała... Gdybym ja był ciekawski, to też bym się zapytał jak się nazywa. Może miła.	Tak! Na przykład, żeby Ola powiedziała "Zobacz, to ta nowa! Może porozmawiamy z nią?", i ta, na przykład mówi "Jak się nazywasz?", żeby ich poznać	Tak	Nie	Są współkapitanami drużyny i się dobrze znają i... migowo się...	Że mówi "tak"	Nie mają już kogo, najwyżej z innej klasy, ale oni też mają już swoje drużyny, wszystkich wybrali, no i wybierają Tomka	NA	Nie (po zadaniu następnego pytania) Albo może wiedzieć. (po odpowiedzi) Albo nie, jednak nie.	Na przykład jak jest klasa, drużyna, to też ma prawo się interesować, jak brakuje im zawodnika... chyba, że w jakimś boksie klasowy	Dobrze	Bo cieszy się, że w ogóle się dostał do tej drużyny	Marek - miły, że w ogóle zainteresował się, bo też mógł pójść do innej klasy, którzy nie mają drużyny (nie rozumiem części) i jest miły, bo wybrał Tomka	Tak - Kamil powie trenerowi "Czy możemy dodać Tomka do kadry, żeby nie był zasmucony?"
	PL-MST-001	score	1	1	2	0	2	2	1	3	2	2	2	1	1	1	2	1	1		0	1	1	2	2	2	4	15	7	4	3
29	PL-MST-002	reply	Tak	Nie	Bo chce ją poznać	Bo się zgadza	Żeby się zapoznać	Bo bardzo długo stały, zanim do niej podeszły	Tak	Dlatego, że ona widzi, że one podchodzą do niej, a nie podchodziłyby, żeby stać po prostu w miejscu	Nieśmiała, zdenerwowana	Stresuje się. Może jej zaczną dokuczać.	Ola - sympatyczna, chce się zaprzyjaźnić	Może podchodzą do niej i ją obrażają?	Tak	Nie	Dlatego, że chcą zobaczyć, jak sobie poradzi, jak nie będzie ostatni wybrany	Bo się zgadza, żeby go wybrać	Żeby zobaczyć, jak sobie poradzi, czy gra dobrze	gdyby tak nie było, to wybraliby go znowu jako ostatniego	nie	Po prostu wiem	Jest szczęśliwy	bo nie został wybrany jako ostatni	Tomek - dobrze gra w piłkę, nieśmiały	Że oni grają potem mecz i wygrywają 13:0, bo 3 osobowa drużyna na 11 to nie bardzo
	PL-MST-002	score	1	1	2	2	1	1	1	1	2	2	2	1	1	1	2	2	2	1	0	0	2	1	2	1	4	15	7	4	2
30	PL-MST-003	reply	Widzi	Nie	Bo może się (z nią) lubi	Bo może jakby tak "chodź do nas" chciała zawołać	Może chcą się z nią pobawić	Bo jeszcze jej nie widzieli i nie mają się z nikim innym bawić i chcą zapytać się, czy się z nimi pobawi	Tak trochę	Bo może rusza, bo po prostu chce się pobawić z nią	Troszkę głupio, bo nie wie, co tamte dziewczynki jej zrobią, bo tamta dziewczynka, co siedzi, nie zna tamtych dziewczynek.	NQ	Ta, która siedziała - taka troszkę przestraszona, nie wie, co te dziewczynki jej zrobią, bo się nie zna z nią. Może myśli, że coś złego im powie, więc jest trochę przestraszona.	Ta dziewczynka nie-nowa jedna kiwnęła głową, bo może po prostu chciała jakoś zawołać albo powiedziała, że jak te dwie dziewczynki chciały przyjść do tamtej dziewczynki, to jedna powiedziała i kiwnęła głową, że lepiej nie idźmy do niej	Tak	Nie	Bo może kiedyś się poznali i po prostu się tak uśmiechał - tamten, co uśmiecha się może nie wie, czy ten dobrze gra w piłkę	Bo nie wie, czy ten zawodnik nadaje się tak do gry i nie wie, czy na przykład on gdzieś nie upadnie, nie wie, jak coś zrobi, jak gra w piłkę	Bo nikogo innego nie mieli do wybrania, a po prostu chcieli pograć	Bo inni byli może niegrzeczni, a tamten był taki spokojny, jeszcze go nie znali na przykład w szkole i chcieli z nim porozmawiać	nie	Bo tak wybierają, a ci koledzy się jeszcze nie znają i trochę niechętnie przychodzi, potem tamci chłopcy na przykład go zachęciali	Niepewnie	Bo nie wie, tak zaprosili go, że może mają jakiś plan, że na przykład nie wiedą, bo myślą, że się słabo uczy i chcą mu coś zrobić i tamten nie wie	Ten, co go zaprosili - on po prostu był taki niepewny siebie i ta osoba nie wiedziała, co ci chłopcy jej zrobią, czuła się tak obco	Bo moźe tamci dwóch chłopców - że najpierw tamten się uśmiechał do niego, bo po prostu jakoś może patrzył i tak się po prostu uśmiechał, tak nie wiedział i potem jeden pokiwał głową, że może lepiej mu nie ufajmy, bo jeszcze go nie znamy i może on tamtych pobije, może on jest silniejszy, gdzieś chodzi i tamci na przykład nie byli pewni siebie, ten troszkę był też niepewny siebie i tamci się też ba…
	PL-MST-003	score	1	1	2	2	2	2	1	2	3		3	2	1	1	2	2	2	3	0	2	2	3	3	3	4	22	8	6	5
31	PL-MST-004	reply	Tak	Nie	Bo chcą pójść do tej dzieczynki	Bo myśli o tym samym, co Ola	Bo chcą się z nią zaprzyjaźnić. Bo chcą z nią pogadać.	Nigdy ze sobą nie rozmawiały.	Nie	Dlatego, że przecież nie czyta im w myślach raczej	Szczęśliwa	No bo raczej, jak chcą z nią pogadać, to szczęśliwa. Smutna, bo nikt z nią nie rozmawiał i podekscytowana, bo teraz z nią rozmawiają.	Nowa dziewczynka - podekscytowana, miła, bo nie ucieka, kiedy ktoś do niej podchodzi i szczęśliwą.	Żeby powiedziały coś, a nie tak	Tak	Nie	Bo chce go wybrać, Tomka	Bo myśli o tym samym	Bo jest fajny	Gdyby nie był fajny, to by go pewnie nie wybrali	Nie	Bo nie czyta im w myślach	Fajnie	Bo jest mu miło, że go wybrali. Podekscytowany, bo go wybrali.	Kamil - miły, bo go wybiera, no i tylko miły	Też, żeby po prostu mówili do siebie
	PL-MST-004	score	1	1	2	2	2	1	0	2	2	2	2	1	1	1	2	2	1	1	0	2	1	2	2	1	4	17	7	4	2
32	PL-MST-005	reply	Tak	Nie	Bo chciała pogadać z tamtą dziewczynką	Bo Ania się zgodziła	Bo chcą z nią pogadać	Jeżeli ona jest nowa, to może chcą ją ośmielić, żeby wiedziała, że nie są groźne i nic jej nie zrobią	Nie	Bo w opowiadaniu było, że ona nie wiedziała, czego od niej chcą	Trochę zaniepokojona	Bo ona nie wie, że te dziewczynki chcą z nią tylko porozmawiać. Przestraszona, bo nie wie, czy nie będą jej wyśmiewać czy coś	Ola - różowe spodnie i ciemnoróżową bluzkę (opis obrazka). Jest dziewczynką. Miła jakaś.	Nie za bardzo	Tak	Nie	Bo pewnie był najlepszy z ostatnich i wybrał go bo, po prostu był najlepszy z tych ostatnich i przydałby się lepiej niż ci gorsi od niego	Bo stwierdza, że można go wziąć	Bo jest najlepszy z tych, co zostali	Bo skoro reszta była gorsza, to bardziej się opłacało wziąć tego lepszego	Nie	Widział, jak mrugają do siebie, ale nie wiedział, o co im chodzi	Zdziwiony i zadowolony, bo przecież Kamil i kolega byli bardzo dobrzy w piłkę i był dumny, że ma takich kolegów w drużynie	NA	Kamil - (opis obrazka), pełen energii, wesoły i miły	Nie
	PL-MST-005	score	1	1	2	2	2	3	0	0	2	3	1	0	1	1	1	2	1	1	0	2	2	0	2	0	4	16	7	3	0
33	PL-ZL-001	reply	Tak	Nie	Bo są przyjaciółkami.	Chce dać Ani komunikat, że będą podchodzić do dziewczynki na huśtawkę.	Zaciekawiły się nią, bo wcześniej z nią nie rozmawiały.	Nie rozmawiały i chciały sprawdzić kim jest i jak się zachowuje.	Tak	Wie, ale nic do nich nie mówi.	Czuje zaciekawienie jak jesy Ola i Ania	Radość, że będą przyjaciółkami, zaniepokojona-dziewczynki coś mogą jej zrobić.	Ola- miła, zaciekawiła się dziewczynką na huśtawce, lubi Anię, zazdrosna-chciała być na huśtawce, przyjazna, ciekawska	Tak, Ania powiedziała dziewczynce na huśtawce: "Możemy się pobawić w berka? Ona na to: "Dobrze,, nazywam się Jadwiga jeszcze się z wami nie bawiłam więc chciałabym spróbować.	Tak	Nie	Bo mówi: "Weźmy go do drużyny".	Odpowiada Markowi: "Tak"	Bo mogą uznać, że jest szybki i może przynieść im coś dobrego.	W mojej szkole było podobnie, ktoś nie za bardzo ją lubił ale wybierał bo jest szybka.	Nie	Nie wie, bo sądzi, że nie jest szybki, bo jest zaskoczony, bo zazwyczaj jest wybierany jako ostatni.	Wesoły	cieszy się, że został wybrany, mino to, że sam nie postrzega siebie jako szybkiego.	Tomek jest miły, cieszy się z decyzji chłopców, nie jest wymagający, ciekawy	Marek i Kamil mówią do Tomka; "Chcesz być z nami w drużynie?" tomek: "Moze tak, ale nie jestem za szybko." marek kamil: "Naszym zdaniem jesteś!"
		score	1	1	2	2	2	2	1	2	2	2	2	2	1	1	2	2	2	3	0	2	2	3	2	2	4	22	9	4	4
34	PL-ZL-002	reply	Tak	Nie	Chcą z nią porozmawiać i się zaprzyjaźnić.	Bo zgadza się na to.	Bo chcą jej powiedzieć, że chcą się zaprzyjaźnić.	Tak to zrozumiałam.	Nie	Bo nie zna myśli innych.	Samotna, troche smutna	Nie ma się z kim bawić.	Nowa dziewczynka , polka, w sukience, a brązowe oczy, jest samotna	Wcześniej Ola i Ania chodziły do innej szkoły, niż dziewczynka na huśtawcem ale zaprzyjaźniły sie dobrze w 3 klasie jak już chodziły razem do szkoły, a wcześniej znały się z podwórka.	Tak	Nie	Myśli, żeby wziąć go do drużyny.	Zgadza się na to.	Nie ma nikogo innego.	Było w historii, że był ostatni do wyboru.	Nie	Zawsze był wybierany jako ostatni.	Fajnie	ktoś go przyjął do drużyny.	Kamil-miły, bo przyjął Tomka.	Nie
		score	1	1	2	2	2	1	0	2	2	1	1	2	1	1	2	2	1	1	0	1	1	1	2	0	4	16	5	3	2
35	PL-KW-001	reply	tak	nie	bo jest nowa	żeby do niej poszły	bo chciały z nią porozmawiać	bo jeszcze nowa dziewczynka z nimi nie rozmawiała	nie	bo się dobrze nie znają	dziwnie	zainteresowanie	bujała się na huśtwce i była zaciekawiona, bo przyszły do niej nowe dziewczynki, jest 'polaczką'	tak, zamiast jednej dziewczynki bujałyby się trzy	tak	tak	bo chcą wybrać go do drużyny	zeby go wziąć	bo był ostatni	bo tak pomyślałam	nie	bo nigdy nie był w drużynie piłkarskiej	zaciekawiony, bo nigdy nie był w drużynie	wesoły, bo będzie w drużynie	czuł sie troszkę dziwnie, bo nigdy nie był w drużynie, czuł się wesoły, bo będzie w drużynie, jest polakiem	nie
	PL-KW-001	score	1	1	1	1	2	2	1	2	1	1	2	1	1	0	2	1	1	0	1	2	2	2	1	0	3	16	6	3	1

## Sheet: sums
code	gender	age_mo	sibling	mother_ed	father_ed	IroAtt_mo	IroAtt_fa	ASS_comprehension	ASS_conceptual role taking	ASS_emphatic sensitivity	ASS_person perception	ASS_alternativeExpl	ASS_sum	child_iro	child_iro_bin	PAR_iroAttid	iro_verbal 0-3	iro_comp
PL-KW-001	1	102	1			3		3	16	2	3	1	22	2	0	3	4	7
PL-MST-002	0	106	1		?	8	4	4	13	7	4	2	26	3	1	12	3	5
PL-MST-003	0	93	1		?	5	2	4	22	8	6	6	42	2	0	7	0	3
PL-MST-004	1	98	1	19	19	13	5	4	15	7	4	2	28	3	1	18	5	8
PL-MST-005	1	99	0	10	10	3	1	4	15		4	0	19	3	1	4	5	8
PL-NBJ-002	0	101	1	8	8	4							0			4	5	8
PL-NBJ-003	0	97	0			7	0						0	3	1	7	3	6
PL-OZ-001	0	97	1			5	6						0	3	1	11	3	6
PL-OZ-002	0	96	1		18	8	4	4	5	5	4	0	14	3	1	12	5	7
PL-OZ-003	0	102	1			8	3						0	3	1	11	2	5
PL-OZ-004	1	102	1	16	16	5	2	3	9	9	3	0	21	3	1	7	7	10
PL-OZ-005	1	98	1			4							0	3	1	4	2	4
PL-ZL-001	1	103	0	6	4	10	4						0			14	9	12
PL-ZP-001	1	105	2	21	17	12	5	4	17	0	4	2	23	3	1	17	4	7
PL-ZP-002	0	102	0	19	12	6	5	4	15	5	6	0	26	3	1	11	3	3
PL-ZP-003	1	108	1	16	12	4	0	4	19	6	4	0	29	3	1	4	2	5
PL-ZP-004	0	103	1	17	15	3	4	4	14	8	3	3	28	3	1	7	1	4
PL-ZP-005	1	98	0	17	17	1	2	4	14	6	3	0	23	2	0	3	0	3
PL-ZP-006	0	104	2	17	17	6	3			6			6	3	1	9	9	12
PL-ZP-007	1	103	1	17	20	10	4	4	18	9	5	3	35	3	1	14	6	9
PL-ZP-008	0	103	1	17	20	2	2	4	20	8	5	2	35	3	1	4	4	7
PL-ZP-009	1	99	1	3	3	6	3	4	18	11	5	2	36	2	0	9	3	5
PL-ZP-010	0	99	1			13	3	4	5	4	3	2	14	3	1	16	3	6
PL-ZP-011	1	98	0			2	5	4	9	5	4	0	18	2	0	7	2	5
PL-ZP-012	1	108	1	19	19	4	0	4	16	6	1	3	26	0	0	4	1	4
PL-ZP-013	0	105	1	17		4	1	4	13	6	2	2	23	1	0	5	3	6
PL-ZP-014	1	96	0	21	17	8	0	4	12	8	2	0	22	3	1	8	8	11
PL-ZS-001	0	101	0	17	18	3		3	10	2	3	0	15			3	2	4
PL-KKK-001	0	94	1			6	2	4	9	8	2	0	19	3	1	8	4	7
PL-KKK-002	1	106	1			9	2	4	15	6	3	0	24	3	1	11	7	10
PL-KKK-003	1	102	1			7	0	4	18	8	4	4	34	3	1	7	7	10
PL-ZL-003	0	104	1			4	5	4	17	5	2	2	26	3	1	9	3	5
PL-ZL-004	1	97	1			2	9	4	18	5	4	4	31	3	1	11	1	4
PL-OZ-006	1	100	1			4	0	4	10	3	3	0	16	2	0	4	0	2
PL-OZ-007	0	96	1			5	4	2	9	5	2	0	16	3	1	9	0	0
PL-OZ-008	0	95	1			5	0	4	11	7	6	0	24	3	1	5	0	1
PL-ZS-002	1	95	0			4	2	3	14	9	2	4	29	3	1	6	3	6
PL-AK-001	1	103	1			3	3	4	18	8	4	6	36	3	1	6	0	0
PL-AK-002	1	107	1			5	6	4	16	7	2	2	27	2	0	11	2	5
PL-AK-003	0	102	1			12	6	4	17	6	3	5	31	3	1	18	4	7
PL-AK-004	0	106	1			6	7	4	17	6	3	3	29	3	1	13	8	11
PL-AK-005	0	104	1			4	10	4	17	8	4	3	32	3	1	14	6	9
PL-AK-006	1	105	1			3	7	4	15	8	3	2	28	3	1	10	5	8
PL-AK-007	1	102	1			1	0	4	10	6	3	2	21	3	1	1	2	4
PL-AK-008	0	100	1			6	9	4	14	7	2	3	26	3	1	15	1	4
PL-ZP-014	1	96	0			7								3	1	7	2	5
